# Supplementary material for: Unraveling the Intricate Nexus of Molecular Mechanisms Governing Rice Root Development: OsMPK3/6 and Auxin-Cytokinin Interplay
Source: PubMed Central journal article supplement (PMC4391785; doi:10.1371/journal.pone.0123620), 2015-04-09
Supplement: pone.0123620.s001.pdf [file pone.0123620.s001.pdf]

## Supporting Information

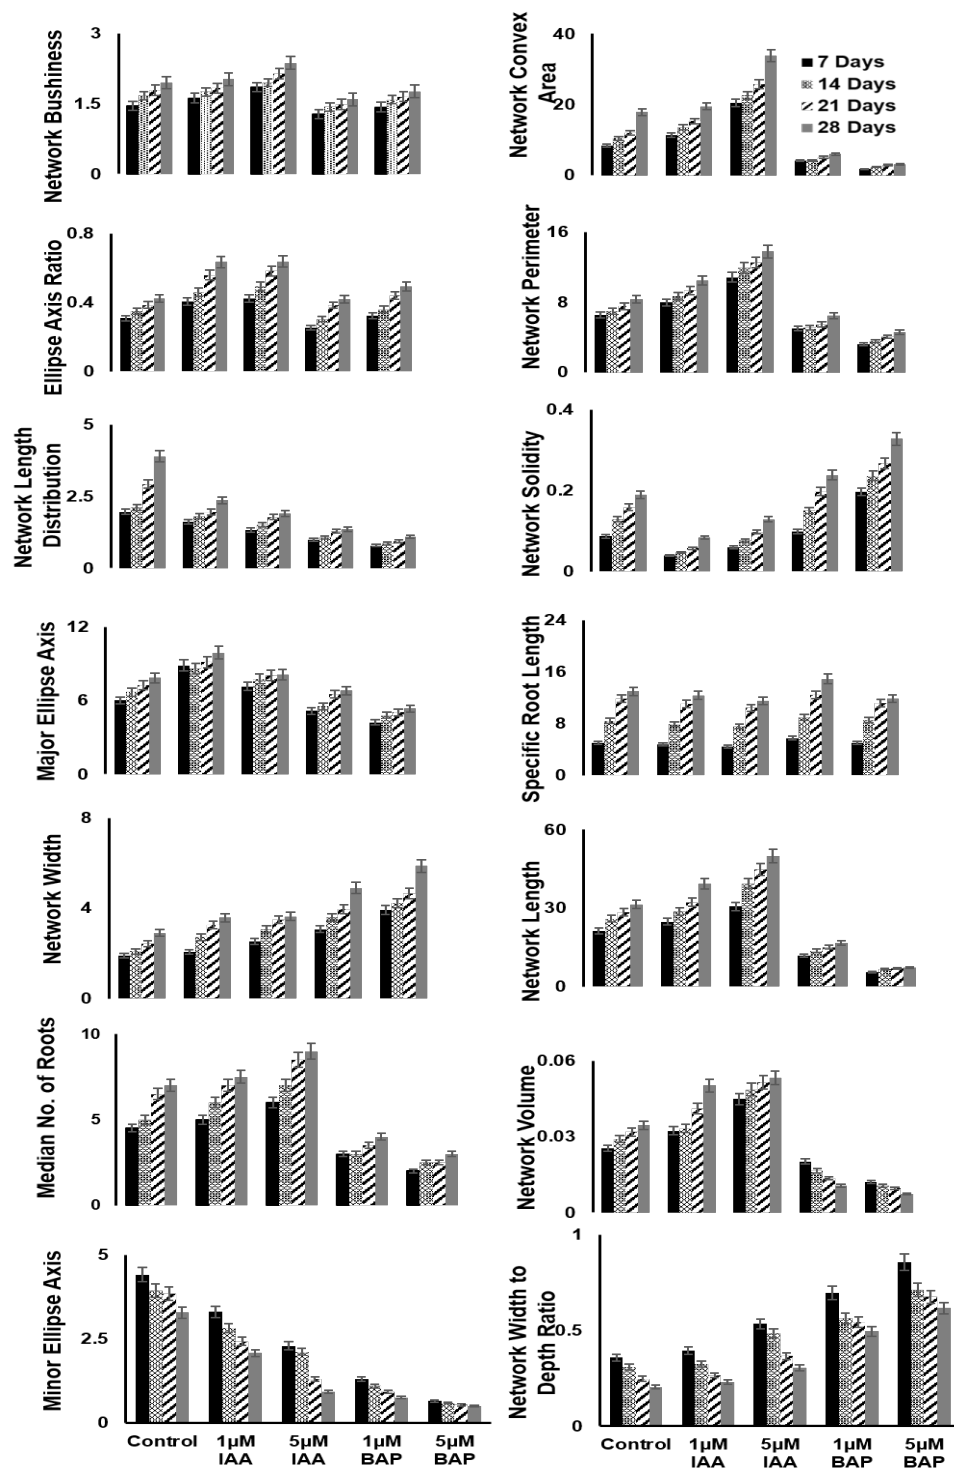

**Figure S1:** Novel root phenotypic parameters in response to auxin and cytokinin treatment. Graphical representation of root phenotypic parameters of untreated as well as 1, 5 $\mu$ M IAA and BAP treated 1-4 week rice seedlings. All the root phenotypic parameters were analysed using GiA roots software framework. Data shown is the average of three triplicates with error bars indicating standard deviation.
