# Supplementary material for: Unraveling the Intricate Nexus of Molecular Mechanisms Governing Rice Root Development: OsMPK3/6 and Auxin-Cytokinin Interplay
Source: PubMed Central journal article supplement (PMC4391785; doi:10.1371/journal.pone.0123620), 2015-04-09
Supplement: pone.0123620.s002.pdf [file pone.0123620.s002.pdf]

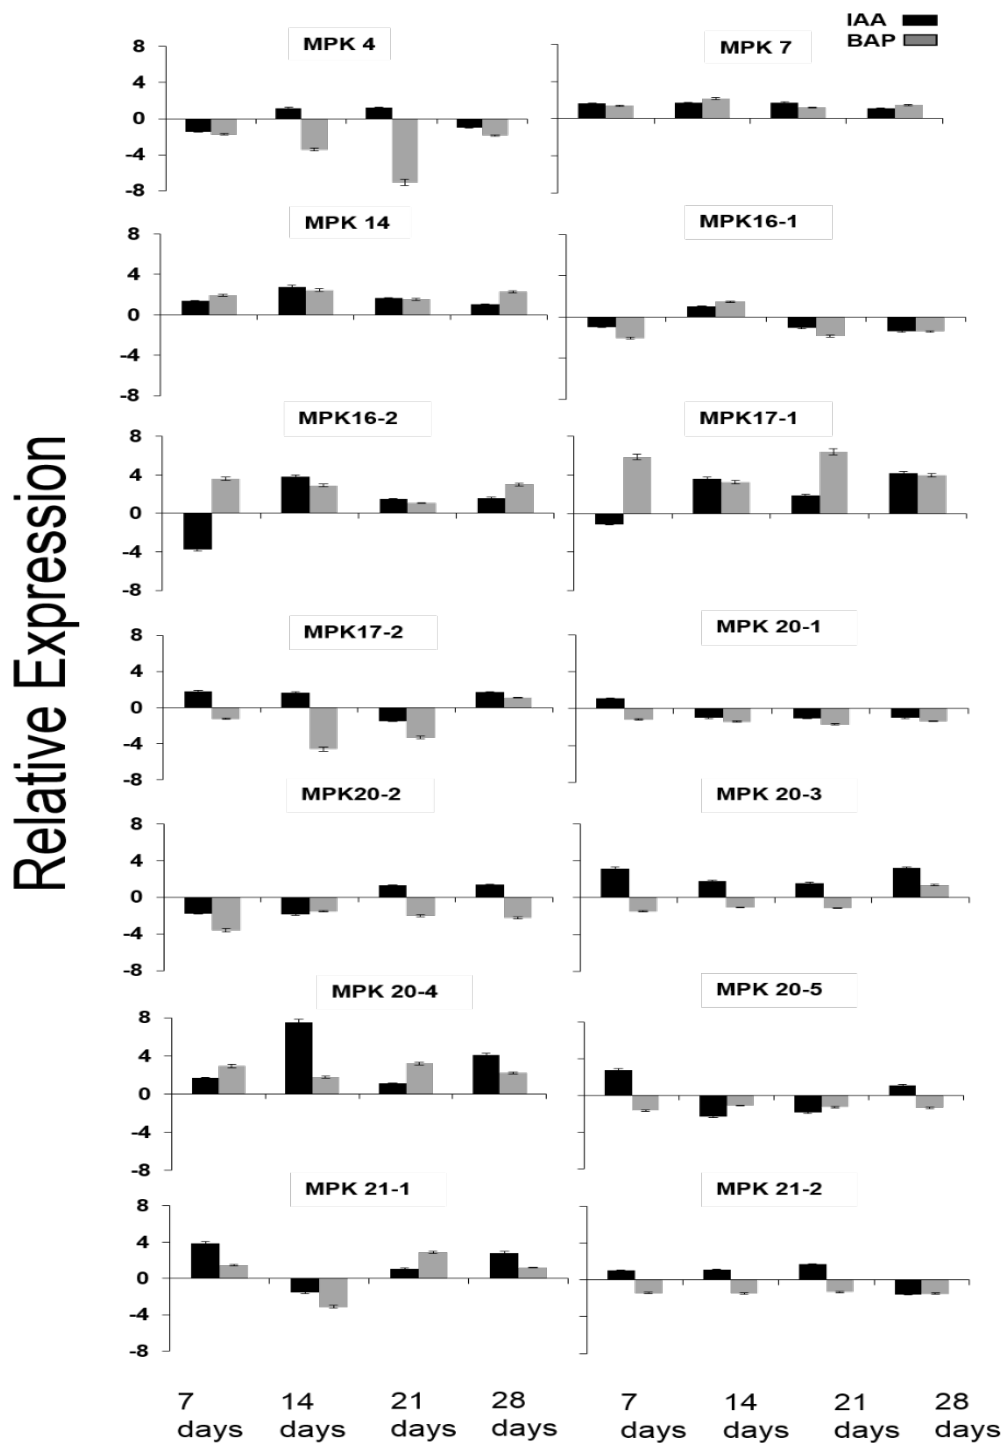

**Figure S2:** Expression pattern of MAPK cascade components in response to auxin and cytokinin treatment by qRT-PCR. On top of the left hand panel is relative expression pattern of a Group B MAPK i.e *OsMPK4*, the next two graphs represents Group C MAPKs i.e *OsMPK7* and *OsMPK14*, while all the others represent members of Group D MAPKs. Seedlings of 1 - 4 weeks were subjected to 1 $\mu$ M auxin and 1 $\mu$ M cytokinin treatments in 1/2 MS media. Expression level of untreated samples was taken as the baseline and all values shown are respective to baseline. Error bars indicate standard deviation of three independent experiments.
