# Supplementary material for: Unraveling the Intricate Nexus of Molecular Mechanisms Governing Rice Root Development: OsMPK3/6 and Auxin-Cytokinin Interplay
Source: PubMed Central journal article supplement (PMC4391785; doi:10.1371/journal.pone.0123620), 2015-04-09
Supplement: pone.0123620.s003.pdf [file pone.0123620.s003.pdf]

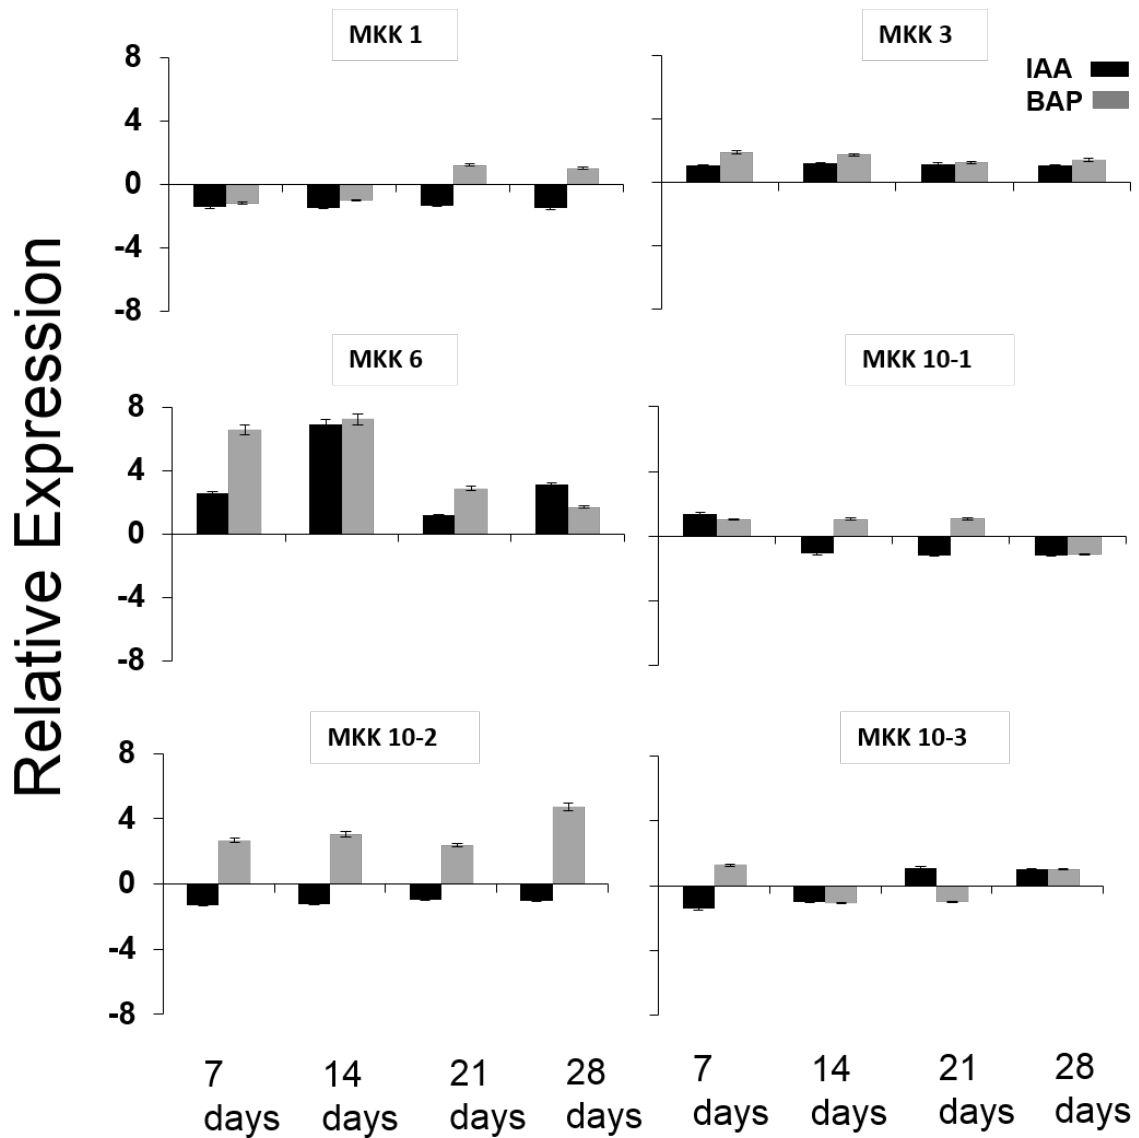

**Figure S3:** Relative expression patterns of MAPKK family members in response to auxin and cytokinin treatment by qRT-PCR. Seedlings of 1 - 4 weeks were subjected to 1 $\mu$ M auxin and 1 $\mu$ M cytokinin treatments in  $\frac{1}{2}$  MS media. Expression level of untreated samples was taken as the baseline and all values shown are respective to baseline. Error bars indicate standard deviation of three independent experiments.
