# Supplementary material for: Unraveling the Intricate Nexus of Molecular Mechanisms Governing Rice Root Development: OsMPK3/6 and Auxin-Cytokinin Interplay
Source: PubMed Central journal article supplement (PMC4391785; doi:10.1371/journal.pone.0123620), 2015-04-09
Supplement: pone.0123620.s004.pdf [file pone.0123620.s004.pdf]

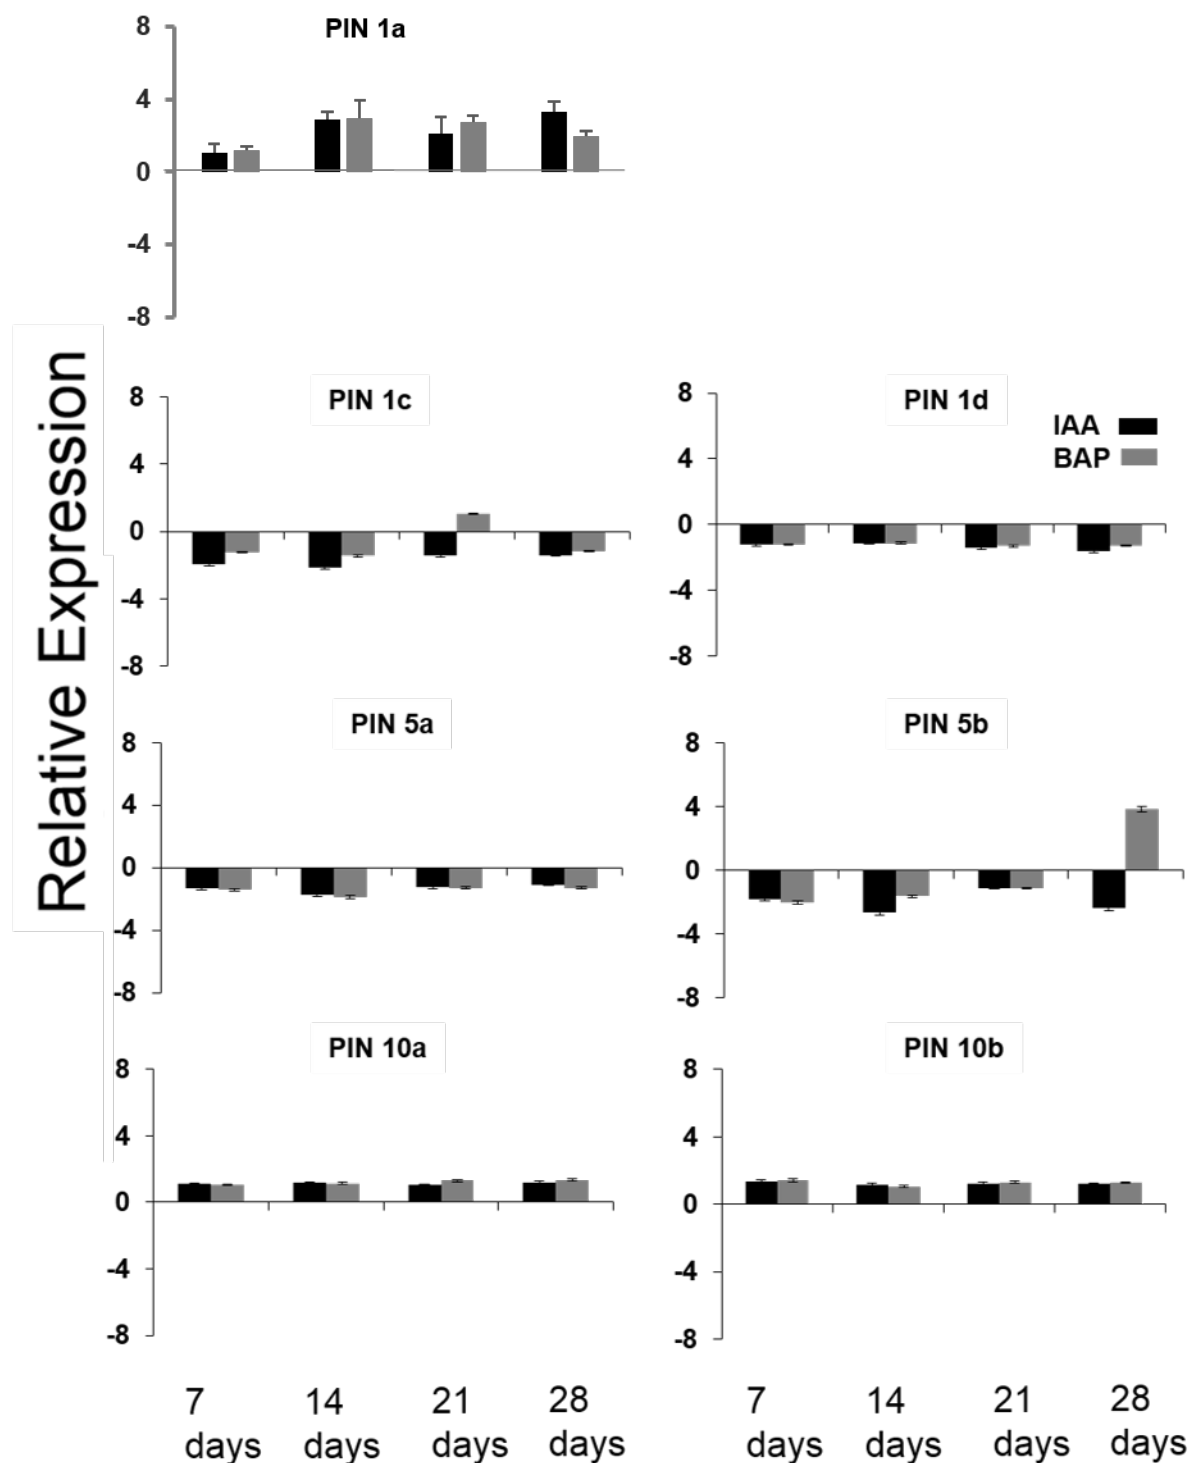

**Figure S4:** Transcript profiling of OsPIN family genes in response to auxin and cytokinin treatment by qRT-PCR. Seedlings of 1 - 4 weeks were subjected to  $1\mu\text{M}$  auxin and  $1\mu\text{M}$  cytokinin treatments in  $\frac{1}{2}$  MS media. Expression level of untreated samples was taken as the baseline and all values shown are respective to baseline. Error bars indicate standard deviation of three independent experiments.
