# Supplementary material for: Unraveling the Intricate Nexus of Molecular Mechanisms Governing Rice Root Development: OsMPK3/6 and Auxin-Cytokinin Interplay
Source: PubMed Central journal article supplement (PMC4391785; doi:10.1371/journal.pone.0123620), 2015-04-09
Supplement: pone.0123620.s005.pdf [file pone.0123620.s005.pdf]

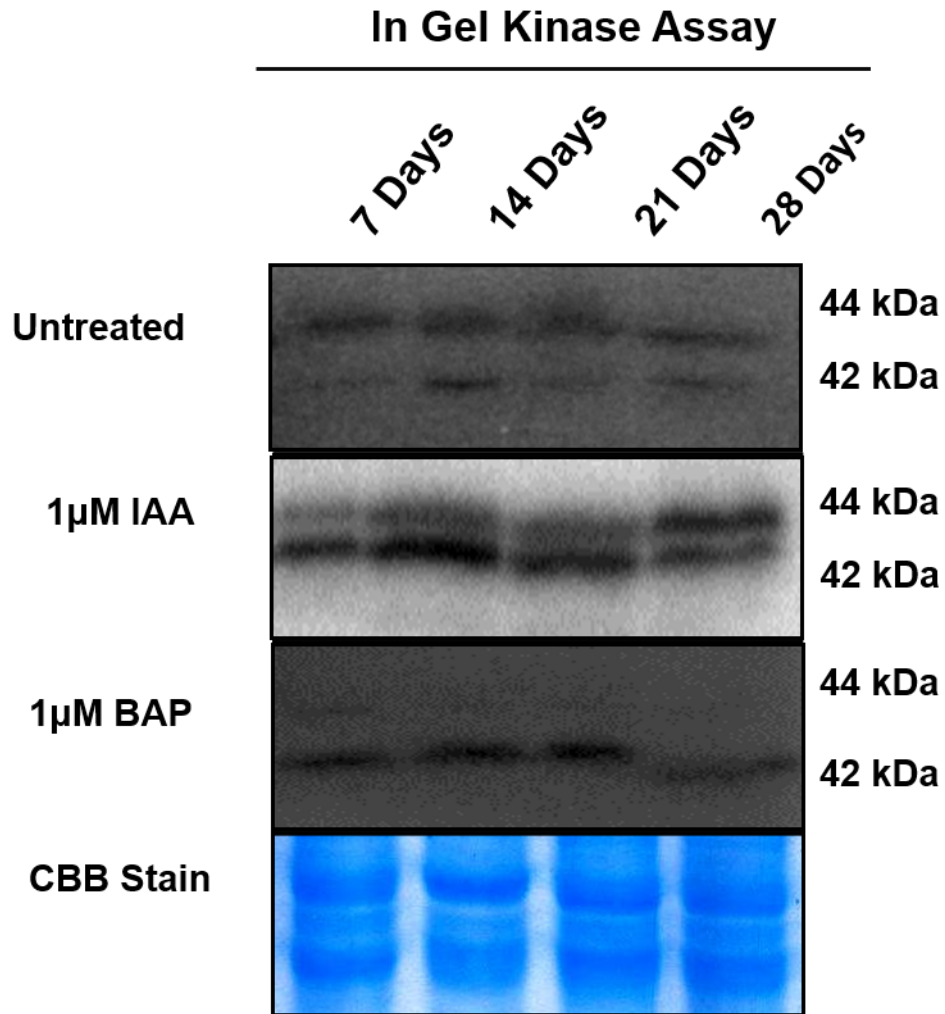

**Figure S5:** In-gel kinase assay using myelin basic protein (MBP) as substrate show MAPK activity signals at ~ 42, and ~44 kDa corresponding to the size of OsMPK3 and OsMPK6, respectively.
