# Supplementary material for: Unraveling the Intricate Nexus of Molecular Mechanisms Governing Rice Root Development: OsMPK3/6 and Auxin-Cytokinin Interplay
Source: PubMed Central journal article supplement (PMC4391785; doi:10.1371/journal.pone.0123620), 2015-04-09
Supplement: pone.0123620.s006.pdf [file pone.0123620.s006.pdf]

**Table S1** List of *MAPK* genes and primer pairs for qRT-PCR

| Serial No. | Gene             | Length   | Primer pairs                                             |
|------------|------------------|----------|----------------------------------------------------------|
| 1.         | <i>OsMPK3</i>    | 19<br>17 | 5'-GCTCCAACCAAGAACTGTC-3'<br>5'-AGTCGCAGATCTTGAGG-3'     |
| 2.         | <i>OsMPK4</i>    | 20<br>20 | 5'-CGAGGTCTCCTCCAAGTACG-3'<br>5'-GCGAAGCAGCTTGATTTCTC-3' |
| 3.         | <i>OsMPK6</i>    | 20<br>20 | 5'-AGGTCACCGCCAAGTACAAG-3'<br>5'-AGCAGCTTGATCTCCCTGAG-3' |
| 4.         | <i>OsMPK7</i>    | 17<br>17 | 5'-GCTCGCACAAACAACAC-3'<br>5'-GCCAAGAAGCTCAGCAA-3'       |
| 5.         | <i>OsMPK14</i>   | 20<br>20 | 5'-TCCTGAGTTGCTCCTTTGCT-3'<br>5'-CGAGCTTTTGGGTTGTCAAT-3' |
| 6.         | <i>OsMPK16-1</i> | 20<br>20 | 5'-CTTTGAGCATGTGTCCGATG-3'<br>5'-TTGGTGCAAATCAGACTCCA-3' |
| 7.         | <i>OsMPK16-2</i> | 20<br>20 | 5'-TGGAGTCTGATTTGCACCAA-3'<br>5'-TGCAAGGCCAAAATCACATA-3' |
| 8.         | <i>OsMPK17-1</i> | 20<br>20 | 5'-TCATCAGAGCGAACGATGAC-3'<br>5'-TGCAACATAATCCGTCCAAA-3' |
| 9.         | <i>OsMPK17-2</i> | 18<br>19 | 5'-GCCTGCTAGAGCGTTTAC-3'<br>5'-CCTTTGTCAGTTTCCTTCG-3'    |
| 10.        | <i>OsMPK20-1</i> | 20<br>20 | 5'-TCGAGGAGGGATTTCAAAGA-3'<br>5'-CTTCAGGTCCCGGTGATAAA-3' |
| 11.        | <i>OsMPK20-2</i> | 20<br>20 | 5'-GCTATGGGGTTGTGTGCTCT-3'<br>5'-ACAATGTCCGGATGCCTTAG-3' |

|     |                  |          |                                                           |
|-----|------------------|----------|-----------------------------------------------------------|
| 12. | <i>OsMPK20-3</i> | 20<br>20 | 5'-GATGCTCCGTGCTTTGAAAT-3'<br>5'-TGCAACATAATCGGTCCAGA-3'  |
| 13. | <i>OsMPK20-4</i> | 17<br>20 | 5'-TTTCGCTCCCAAGGACT-3'<br>5'-CCCATTGCACTCAAATTCTC-3'     |
| 14. | <i>OsMPK20-5</i> | 20<br>20 | 5'-AGAGAACCATCATGCCAACC-3'<br>5'-GTGTTTTTCGGAGCCATTCAT-3' |
| 15. | <i>OsMPK21-1</i> | 20<br>20 | 5'-CGAGTGGCGATCAAGAAGAT-3'<br>5'-ATGTCCCTGAATTCCCTCCT-3'  |
| 16. | <i>OsMPK21-2</i> | 20<br>20 | 5'-CCGGAGTTCTTCAGCGAGTA-3'<br>5'-AGGAGGCGGAGTAGCTTGAT-3'  |
