# Supplementary material for: Unraveling the Intricate Nexus of Molecular Mechanisms Governing Rice Root Development: OsMPK3/6 and Auxin-Cytokinin Interplay
Source: PubMed Central journal article supplement (PMC4391785; doi:10.1371/journal.pone.0123620), 2015-04-09
Supplement: pone.0123620.s007.pdf [file pone.0123620.s007.pdf]

**Table S2** List of *MAPKK* genes and primer pairs for qRT-PCR

| <b>Serial No.</b> | <b>Gene</b>      | <b>Length</b> | <b>Primer pairs</b>        |
|-------------------|------------------|---------------|----------------------------|
| 1.                | <i>OsMKK1</i>    | 20            | 5'-ACCATCGGCAAATTCCTGAC-3' |
|                   |                  | 20            | 5'-GAACCAACTGCACGATTCCA-3' |
| 2.                | <i>OsMKK3</i>    | 20            | 5'-GTTGAATTCCAGGGTGCATT-3' |
|                   |                  | 20            | 5'-TTCATGCAAGTAGCGCAAAC-3' |
| 3.                | <i>OsMKK4</i>    | 20            | 5'-GGACCATCGCCTACATGAGC-3' |
|                   |                  | 20            | 5'-GGCGAGTCGGAGTAGCAAAT-3' |
| 4.                | <i>OsMKK5</i>    | 20            | 5'-CGGCCTCAGCATCCTAGAGT-3' |
|                   |                  | 20            | 5'-ATAGCAGATGGCGCACATGA-3' |
| 5.                | <i>OsMKK6</i>    | 20            | 5'-TCCGAGGAAACTGCAGATGA-3' |
|                   |                  | 20            | 5'-TTTGCGAACTGCCTCTTGAA-3' |
| 6.                | <i>OsMKK10-1</i> | 20            | 5'-ACGTGTGGTCCCTGGGAGT-3'  |
|                   |                  | 19            | 5'-CCTCCTCCAGTCCTTCTCCA-3' |
| 7.                | <i>OsMKK10-2</i> | 19            | 5'-ACCTCAAGCCGTCGAACCT-3'  |
|                   |                  | 19            | 5'-CTACCCCGAGGCTCCACAC-3'  |
| 8.                | <i>OsMKK10-3</i> | 18            | 5'-GCTGCTCCTCGAGCTGGT-3'   |
|                   |                  | 20            | 5'-AAGTCGGCGATCTTCACCTC-3' |
