# Supplementary material for: Unraveling the Intricate Nexus of Molecular Mechanisms Governing Rice Root Development: OsMPK3/6 and Auxin-Cytokinin Interplay
Source: PubMed Central journal article supplement (PMC4391785; doi:10.1371/journal.pone.0123620), 2015-04-09
Supplement: pone.0123620.s008.pdf [file pone.0123620.s008.pdf]

**Table S3** List of *PIN* genes and primer pairs for qRT-PCR

| Serial No. | Gene            | Length | Primer pairs                    |
|------------|-----------------|--------|---------------------------------|
| 1.         | <i>OsPIN1a</i>  | 20     | 5'- GGGCTCCAGCTTCAACCACA -3'    |
|            |                 | 20     | 5'- TGGAGGTCTTTGCCGTCCTC -3'    |
| 2.         | <i>OsPIN1b</i>  | 19     | 5'- ACGCGTCCAAGCCCAAGTA -3'     |
|            |                 | 20     | 5'- CTGTCCATGACGCCCCTGTT -3'    |
| 3.         | <i>OsPIN1c</i>  | 20     | 5'- GCAGTCACACTCGCAGTCCA -3'    |
|            |                 | 20     | 5'- GTCCTTCCTCTTCCCCACCA -3'    |
| 4.         | <i>OsPIN1d</i>  | 20     | 5'- AGGTGAAGGAGGACGGCAAG -3'    |
|            |                 | 20     | 5'- GAAGTCGGTGTGGTTGAAGC -3'    |
| 5.         | <i>OsPIN2</i>   | 20     | 5'- GAGATCGAGGACGGGCTGAA -3'    |
|            |                 | 20     | 5'- CTGATGAGCTTGCGCCACAC -3'    |
| 6.         | <i>OsPIN5a</i>  | 20     | 5'- TCCGTCTTCCAGGCCATTGT -3'    |
|            |                 | 19     | 5'- ACTTTCACCAGCGCCCACA -3'     |
| 7.         | <i>OsPIN5b</i>  | 20     | 5'- TCCTGCACCTCGCCATCATA -3'    |
|            |                 | 20     | 5'- CAAAGCCCAGAACCGCGTAA -3'    |
| 8.         | <i>OsPIN5c</i>  | 20     | 5'- ACCCCTTCGCCCTCAGCTAC -3'    |
|            |                 | 20     | 5'- CGACGAGCGTGTGTTGTTTCAGC -3' |
| 9.         | <i>OsPIN9</i>   | 20     | 5'- GCTTCCTTGGCCTCATCTGG -3'    |
|            |                 | 20     | 5'- GCATCACAACCGGGCCTATC -3'    |
| 10.        | <i>OsPIN10a</i> | 20     | 5'- ACGGCTCAGGCAAAGAGCAC -3'    |
|            |                 | 20     | 5'- GCTCGACCCCATCTTCGTCA -3'    |
| 11.        | <i>OsPIN10b</i> | 20     | 5'- CGCTGTACGTGGCGATGATG -3'    |
|            |                 | 20     | 5'- GACGAAGCGGAGGTTTCATGG -3'   |
