# Supplementary material for: Unraveling the Intricate Nexus of Molecular Mechanisms Governing Rice Root Development: OsMPK3/6 and Auxin-Cytokinin Interplay
Source: PubMed Central journal article supplement (PMC4391785; doi:10.1371/journal.pone.0123620), 2015-04-09
Supplement: pone.0123620.s009.pdf [file pone.0123620.s009.pdf]

**Table S4** List of antibodies used for immunoblot analyses

| <b>Name of Antibody</b>                                | <b>Manufacturer</b>       | <b>Dilution</b> |
|--------------------------------------------------------|---------------------------|-----------------|
| Rabbit polyclonal anti P44/42MAPK (T202/Y204) pTEpY    | CELL SIGNALING Technology | 1:7,500         |
| Rabbit polyclonal anti AtMPK6                          | SIGMA                     | 1:10,000        |
| Rabbit polyclonal anti AtMPK3                          | SIGMA                     | 1:10,000        |
| Horse Radish Peroxidase (HRP) coupled anti-rabbit IgGs | PIERCE                    | 1:5,00          |
